# Supplementary material for: Complexes of amino acids with a crown-ether derivative of 4-styrylpyridine. Monotopic or ditopic?
Source: Royal Society of Chemistry journal article supplement (doi:10.1039/c1pp05007a), 2011-10-31

## Complexes of amino acids with a crown-ether derivative of 4-styrylpyridine. Monotopic or ditopic?

O. A. Fedorova,<sup>\*a</sup> Yu. V. Fedorov,<sup>a</sup> I. E. Labazava,<sup>a</sup> E. N. Gulakova,<sup>a</sup> J. Saltiel<sup>\*b</sup>

### Electronic Supplementary Information

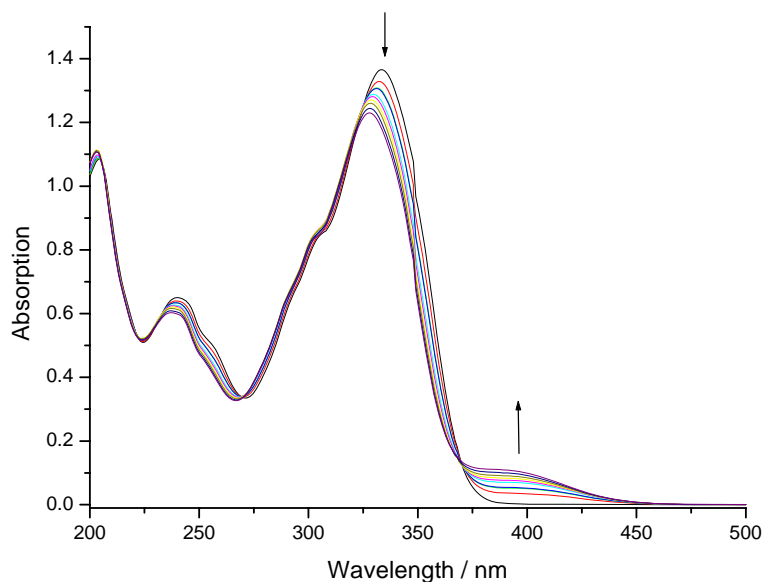

Fig. S1. UV-Vis spectra of ligand *E-1* alone and in the presence of protonated amino acid **A2** in MeCN.  $[E-1] = 5 \times 10^{-5} \text{ M}$  to  $4.73 \times 10^{-5} \text{ M}$ ,  $[A2] = 0$  to  $4 \times 10^{-4} \text{ M}$ . The shoulder at 390 nm is due to protonation by  $< 0.5\%$  excess  $\text{HClO}_4$  in **A2**.

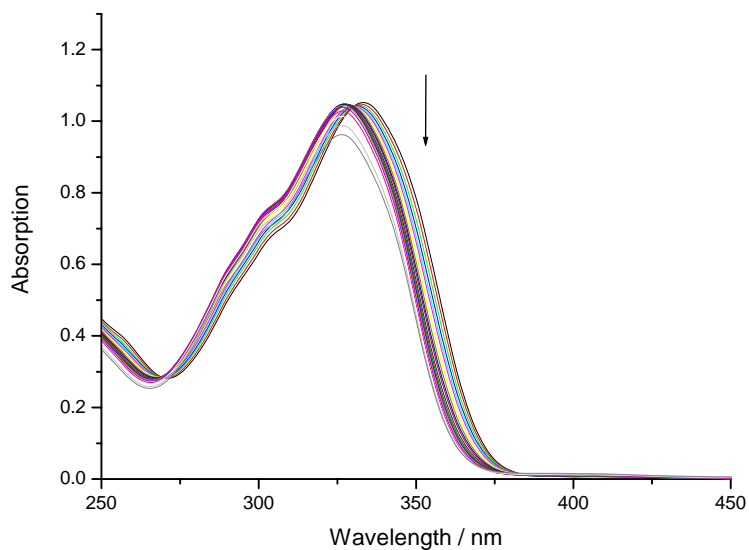

Fig. S2. UV-Vis spectra of ligand *E-1* alone and in the presence of protonated amino acid **A5** in  $\text{CH}_3\text{CN}$ , 25 °C.  $[E-1] = 4.0 \times 10^{-5} - 3.53 \times 10^{-5} \text{ M}$ ,  $[A5] = 0 - 2.3 \times 10^{-3} \text{ M}$ .

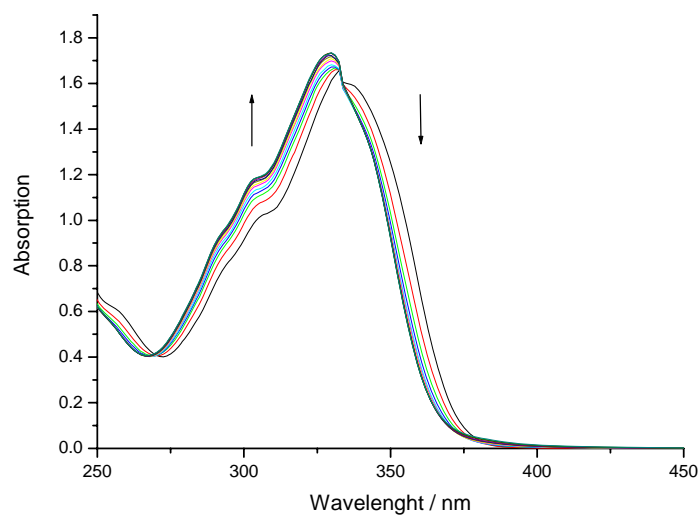

**Fig. S3.** UV-Vis spectra of ligand *E-1* alone and in the presence of protonated amino acid **A10** in CH<sub>3</sub>CN, 25 °C. [*E-1*] =  $6.1 \times 10^{-5}$  –  $5.9 \times 10^{-5}$  M, [**A10**] = 0 –  $5.9 \times 10^{-4}$  M.

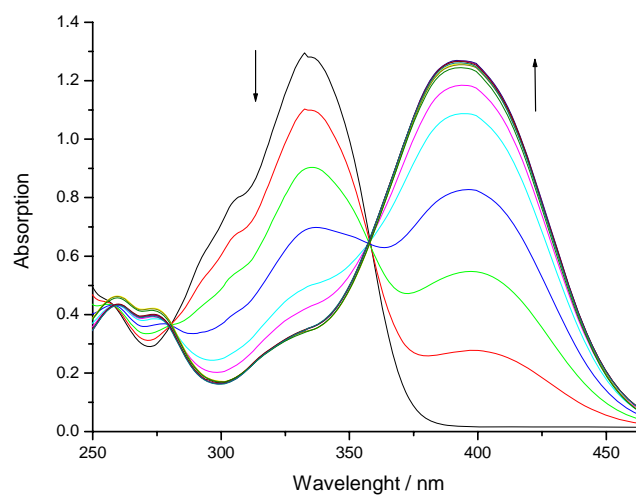

**Fig. S4.** UV-Vis spectra of ligand *E-1* alone and in the presence of HClO<sub>4</sub> in CH<sub>3</sub>CN, 25 °C. [*E-1*] =  $4.9 \times 10^{-5}$  –  $4.7 \times 10^{-5}$  M, [HClO<sub>4</sub>] = 0 –  $6.85 \times 10^{-5}$  M.

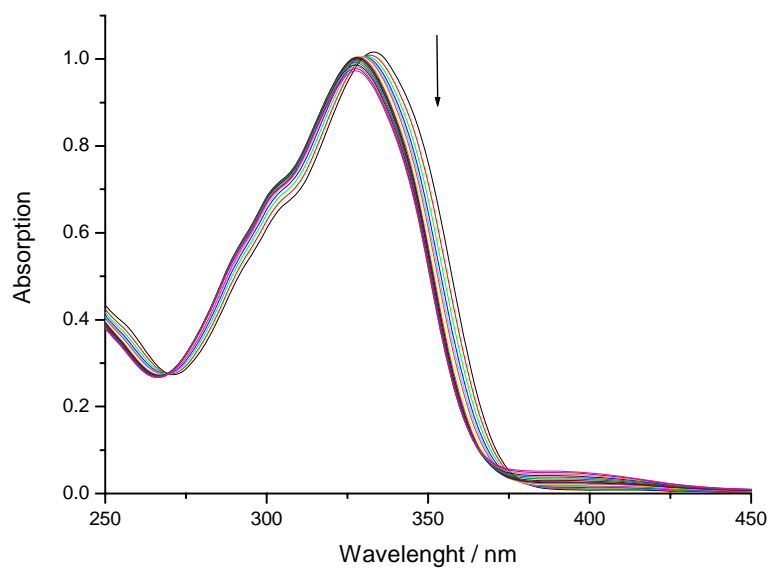

**Fig. S5.** UV-Vis spectra of ligand *E-1* alone and in the presence of  $\text{NH}_4\text{ClO}_4$  in  $\text{CH}_3\text{CN}$ , 25 °C.  $[E-1] = 3.9 \times 10^{-5} - 3.8 \times 10^{-5} \text{ M}$ ,  $[\text{NH}_4\text{ClO}_4] = 0 - 6.1 \times 10^{-4} \text{ M}$ .

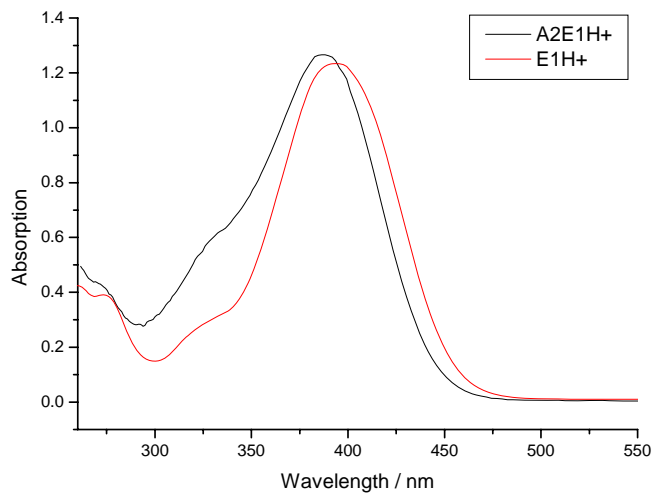

**Fig. S6.** Comparison of the  $E-1 \cdot \text{H}^+$  and  $E-1 \cdot \text{H}^+ \cdot \text{A2}$  spectra in Figs. 1 and 3, respectively.

<sup>1</sup>H NMR characterization:

*E-4*-[2-(6,7,9,10,12,13,15,16,18,19-Decahydro-5,8,11,14,17,20-hexaoxa-benzocyclo-octadecen-2-yl)-vinyl]-pyridine (**E-1**): <sup>1</sup>H NMR (500.13 MHz, CD<sub>3</sub>CN): δ = 3.53 (m, 4H, 2 OCH<sub>2</sub>); 3.56 (m, 4H, 2 OCH<sub>2</sub>); 3.62 (m, 4H, 2 OCH<sub>2</sub>); 3.76 and 3.78 (both m, 4H, 2 OCH<sub>2</sub>); 4.11 and 4.16 (both m, 4H, 2 OCH<sub>2</sub>); 6.96 (d, 1H, H-5', *J* = 8.2 Hz); 7.14 (d, 1H, H-b, *J* = 16.3 Hz); 7.15 (dd, 1H, H-6', *J* = 1.4, 8.2 Hz); 7.31 (d, 1H, H-2', *J* = 1.4 Hz); 7.46 (d, 1H, H-a, *J* = 16.3 Hz); 7.51 (d, 2H, H-3, H-5, *J* = 5.9 Hz); 8.52 (d, 2H, H-2, H-6, *J* = 5.9 Hz).

*E-1*·HClO<sub>4</sub>: <sup>1</sup>H NMR (500.13 MHz, CD<sub>3</sub>CN): δ = 3.55 (m, 4H, 2 OCH<sub>2</sub>); 3.59 (m, 4 H, 2 OCH<sub>2</sub>); 3.66 (m, 4H, 2 OCH<sub>2</sub>); 3.86 (m, 4H, 2 OCH<sub>2</sub>); 4.02 and 4.13 (both m, 4H, 2 OCH<sub>2</sub>); 6.86 (d, 1H, H-5', *J* = 8.5 Hz); 6.86 (d, 1H, H-b, *J* = 16.5 Hz); 6.99 (s, 1H, H-2'); 7.15 (d, 1H, H-6', *J* = 8.5 Hz); 7.37 (d, 1H, H-a, *J* = 16.5 Hz); 7.56 (d, 2H, H-3, H-5, *J* = 5.5 Hz); 8.60 (m, 2H, H-2, H-6, splitting by adjacent H-3(H-5) and pyridinium protons).

*E-1*·NH<sub>4</sub>ClO<sub>4</sub>: <sup>1</sup>H NMR (500.13 MHz, CD<sub>3</sub>CN): δ = 3.60 (m, 4H, 2 OCH<sub>2</sub>); 3.64 (m, 8H, 4 OCH<sub>2</sub>); 3.83 (m, 4H, 2 OCH<sub>2</sub>); 4.20 (m, 4H, 2 OCH<sub>2</sub>); 6.96 (d, 1H, H-5', *J* = 8.5 Hz); 7.05 (d, 1H, H-b, *J* = 16.5 Hz); 7.15 (d, 1H, H-6', *J* = 8.6 Hz); 7.21 (s, 1H, H-2'); 7.40 (d, 1H, H-a, *J* = 16.5 Hz); 7.47 (d, 2H, H-3, H-5, *J* = 4.9 Hz); 8.53 (broad s, 2H, H-2, H-6, broadened by adjacent H-3(H-5) and proton).

*E-1*·**A2**: <sup>1</sup>H NMR (500.13 MHz, CD<sub>3</sub>CN): δ = 2.00 - 2.40 (m, 4H, CH<sub>2</sub>N, CH<sub>2</sub>CO<sub>2</sub>H); 3.71 (m, 4H, 2 OCH<sub>2</sub>); 3.73 (m, 4H, 4 OCH<sub>2</sub>); 3.77 (m, 4H, 2 OCH<sub>2</sub>); 3.85 and 3.89 (both m, 4H, 2 OCH<sub>2</sub>); 4.04 and 4.17 (both m, 4H, 2 OCH<sub>2</sub>); 6.88 (m, 2H, H-5', H-b, *J* = 16.4 Hz); 7.02 (s, 1H, H-2'); 7.15 (d, 1H, H-6', *J* = 8.5 Hz); 7.37 (d, 1H, H-a, *J* = 16.4 Hz); 7.52 (d, 2H, H-3, H-5, *J* = 6.7 Hz); 8.53 (d, 2H, H-2, H-6, *J* = 6.7 Hz).

*E-1*·H<sup>+</sup>·**A2**: <sup>1</sup>H NMR (500.13 MHz, CD<sub>3</sub>CN): δ = 2.00 - 2.40 (m, 4H, CH<sub>2</sub>N, CH<sub>2</sub>CO<sub>2</sub>H); 3.71 (m, 4H, 2 OCH<sub>2</sub>); 3.77 (m, 8H, 4 OCH<sub>2</sub>); 3.85 and 3.88 (both m, 4H, 2 OCH<sub>2</sub>); 4.05 and 4.15 (both m, 4H, 2 OCH<sub>2</sub>); 6.89 (d, 1H, H-5', *J* = 8.5 Hz); 6.87 (d, 1H, H-b, *J* = 16.4 Hz); 7.11 (s, 1H, H-2'); 7.17 (d, 1H, H-6', *J* = 8.5 Hz); 7.44 (d, 1H, H-a, *J* = 16.4 Hz); 7.52 (d, 2H, H-3, H-5, *J* = 6.7 Hz); 8.59 (d, 2H, H-2, H-6, *J* = 6.7 Hz).

*E-1*·**A5**: <sup>1</sup>H NMR (500.13 MHz, CD<sub>3</sub>CN): δ = 1.27 (m, 2H, γ-CH<sub>2</sub> from **A5**); 1.48 (m, 4H, β- and δ-CH<sub>2</sub> from **A5**); 2.19 (t, 2H, CH<sub>2</sub>COOH, *J* = 7.3 Hz); 2.83 (t, 2H, CH<sub>2</sub>NH<sub>3</sub><sup>+</sup>, *J* = 7.3 Hz); 3.67 (m, 4H, 2 OCH<sub>2</sub>); 3.70 (m, 4H, 2 OCH<sub>2</sub>); 3.74 (m, 4H, 2 OCH<sub>2</sub>); 3.88 and 3.92 (both m, 4H, 2 OCH<sub>2</sub>); 4.26 and 4.32 (both m, 4H, 2 OCH<sub>2</sub>); 7.05 (d, 1H, H-5', *J* = 8.5 Hz); 7.15 (d, 1H, H-b, *J* = 16.5 Hz); 7.22 (dd, 1H, H-6', *J* = 1.8, 8.5 Hz); 7.31 (d, 1H, H-2', *J* = 1.8 Hz); 7.41 (d, 1H, H-a, *J* = 16.5 Hz); 7.46 (d, 2H, H-3, H-5, *J* = 5.5 Hz); 8.55 (d, 2H, H-2, H-6 *J* = 5.5 Hz).

*E-1*·**A10**: <sup>1</sup>H NMR (500.13 MHz, CD<sub>3</sub>CN): δ = 1.12 - 1.32 (m, 12H, (CH<sub>2</sub>)<sub>6</sub>); 1.45 (m, 2H, β-CH<sub>2</sub> from **A10**); 1.51 (m, 2H, ι-CH<sub>2</sub> from **A10**); 2.24 (t, 2H, CH<sub>2</sub>COOH, *J* = 7.3 Hz); 2.83 (t, 2H, CH<sub>2</sub>NH<sub>3</sub><sup>+</sup>, *J* = 7.3 Hz); 3.68 (m, 4H, 2 OCH<sub>2</sub>); 3.71 (m, 4H, 2 OCH<sub>2</sub>); 3.75 (m, 4H, 2 OCH<sub>2</sub>); 3.89 and 3.92 (both m, 4H, 2 OCH<sub>2</sub>); 4.26 and 4.31 (both m, 4H, 2 OCH<sub>2</sub>); 7.05 (d, 1H, H-5', *J* = 8.6 Hz); 7.12 (d, 1H, H-b, *J* = 16.5 Hz); 7.23 (dd, 1H, H-6', *J* = 1.8, 8.5 Hz); 7.32 (d, 1H, H-2', *J* = 1.8 Hz); 7.41 (d, 1H, H-a, *J* = 16.5 Hz);

7.49 (broad s, 2H, H-3, H-5, broadening due to splitting by H-2(H-6)); 8.56 (very broad s, 2H, H-2, H-6, broadening due to splitting by H-3(H-5) and H bonding at N).

Z-4-[2-(2,3,5,6,8,9,11,12,14,15-Decahydro-1,4,7,10,13,16-benzohexaoxacyclooctadecin-18-yl)vinyl]pyridine (**Z-1**):  $^1\text{H NMR}$  (300.16 MHz,  $\text{CD}_3\text{CN}$ ):  $\delta$  = 3.56 (m, 4 H, 2  $\text{OCH}_2$ ); 3.58 (m, 6 H, 3  $\text{OCH}_2$ ); 3.61 and 3.75 (both m, 6 H, 3  $\text{OCH}_2$ ); 3.87 and 4.13 (both m, 4 H, 2  $\text{OCH}_2$ ); 6.51 (d, 1 H, H-b,  $J$  = 12.2 Hz); 6.75 (s, 1 H, H-2'); 6.77 (d, 1 H, H-a,  $J$  = 12.3 Hz); 6.81 (d, 1 H, H-6,  $J$  = 8.5 Hz); 6.84 (d, 1 H, H-5',  $J$  = 8.6 Hz); 7.20 (d, 2 H, H-3, H-5,  $J$  = 5.4 Hz); 8.45 (d, 2 H, H-2, H-6,  $J$  = 5.5 Hz).

(**Z-1**)- $\text{NH}_4\text{ClO}_4$ :  $^1\text{H NMR}$  (300.16 MHz,  $\text{CD}_3\text{CN}$ ):  $\delta$  = 3.56 (m, 8 H, 4  $\text{OCH}_2$ ); 3.59 (m, 4 H, 2  $\text{OCH}_2$ ); 3.77 and 3.88 (2 m, 4 H, 2  $\text{OCH}_2$ ); 4.16 (m, 4 H, 2  $\text{ArOCH}_2$ ); 6.95 (d, 1 H, H-5',  $J$  = 8.5 Hz); 7.04 (d, 1 H, H-b,  $J$  = 16.5 Hz); 7.15 (d, 1 H, H-6',  $J$  = 8.6 Hz); 7.21 (s, 1 H, H-2'); 7.39 (d, 1 H, H-a,  $J$  = 16.5 Hz); 7.47 (d, 2 H, H-3, H-5,  $J$  = 4.9 Hz); 8.46 (broad s, 2 H, H-2, H-6).

(**Z-1**)-**A5**:  $^1\text{H NMR}$  (300.16 MHz,  $\text{CD}_3\text{CN}$ ):  $\delta$  = 1.26 (m, 2 H,  $\text{CH}_2$  of **A5**); 1.46 (m, 4 H,  $2\text{CH}_2$  of **A5**); 2.19 (tr, 2 H,  $\text{CH}_2\text{COOH}$  of **A5**,  $J$  = 7.3 Hz); 2.80 (tr, 2 H,  $\text{CH}_2\text{NH}_3^+$  of **A5**,  $J$  = 6.7 Hz); 3.65 (m, 4 H, 2  $\text{OCH}_2$ ); 3.67 (m, 4 H, 2  $\text{OCH}_2$ ); 3.68 (m, 4 H, 2  $\text{OCH}_2$ ); 3.74 and 3.85 (2 m, 4 H, 2  $\text{OCH}_2$ ); 3.92 and 4.20 (both m, 4 H, 2  $\text{ArOCH}_2$ ); 6.57 (d, 1 H, H-b,  $J$  = 11.6 Hz); 6.79 (d, 1 H, H-a,  $J$  = 12.2 Hz); 6.82 (s, 1 H, H-2'); 6.88 (d, 1 H, H-6',  $J$  = 8.5 Hz); 6.92 (d, 1 H, H-5',  $J$  = 8.5 Hz); 7.20 (d, 2 H, H-3, H-5,  $J$  = 4.9 Hz); 8.46 (broad s, 2 H, H-2, H-6).

(**Z-1**)-**A10**:  $^1\text{H NMR}$  (300.16 MHz,  $\text{CD}_3\text{CN}$ ):  $\delta$  = 1.26 (m, 8 H,  $4\text{CH}_2$  of **A10**); 1.42 (m, 4 H,  $2\text{CH}_2$  of **A10**); 1.55 (m, 4 H,  $2\text{CH}_2$  of **A10**); 2.23 (m, 2 H,  $\text{CH}_2\text{COOH}$  of **A10**); 2.80 (broad s, 2 H,  $\text{CH}_2\text{NH}_3^+$  from **A10**); 3.66 (m, 4 H, 2  $\text{OCH}_2$ ); 3.68 (m, 4 H, 2  $\text{OCH}_2$ ); 3.69 (m, 4 H, 2  $\text{OCH}_2$ ); 3.76 and 3.86 (both m, 4 H, 2  $\text{OCH}_2$ ); 3.93 and 4.20 (both m, 4 H, 2  $\text{ArOCH}_2$ ); 6.57 (d, 1 H, H-b,  $J$  = 12.2 Hz); 6.80 (d, 1 H, H-a,  $J$  = 12.2 Hz); 6.84 (s, 1 H, H-2'); 6.89 (d, 1 H, H-6',  $J$  = 8.5 Hz); 6.93 (d, 1 H, H-5',  $J$  = 8.5 Hz); 7.22 (broad s, 2 H, H-3, H-5); 8.46 (broad s, 2H, H-2, H-6).

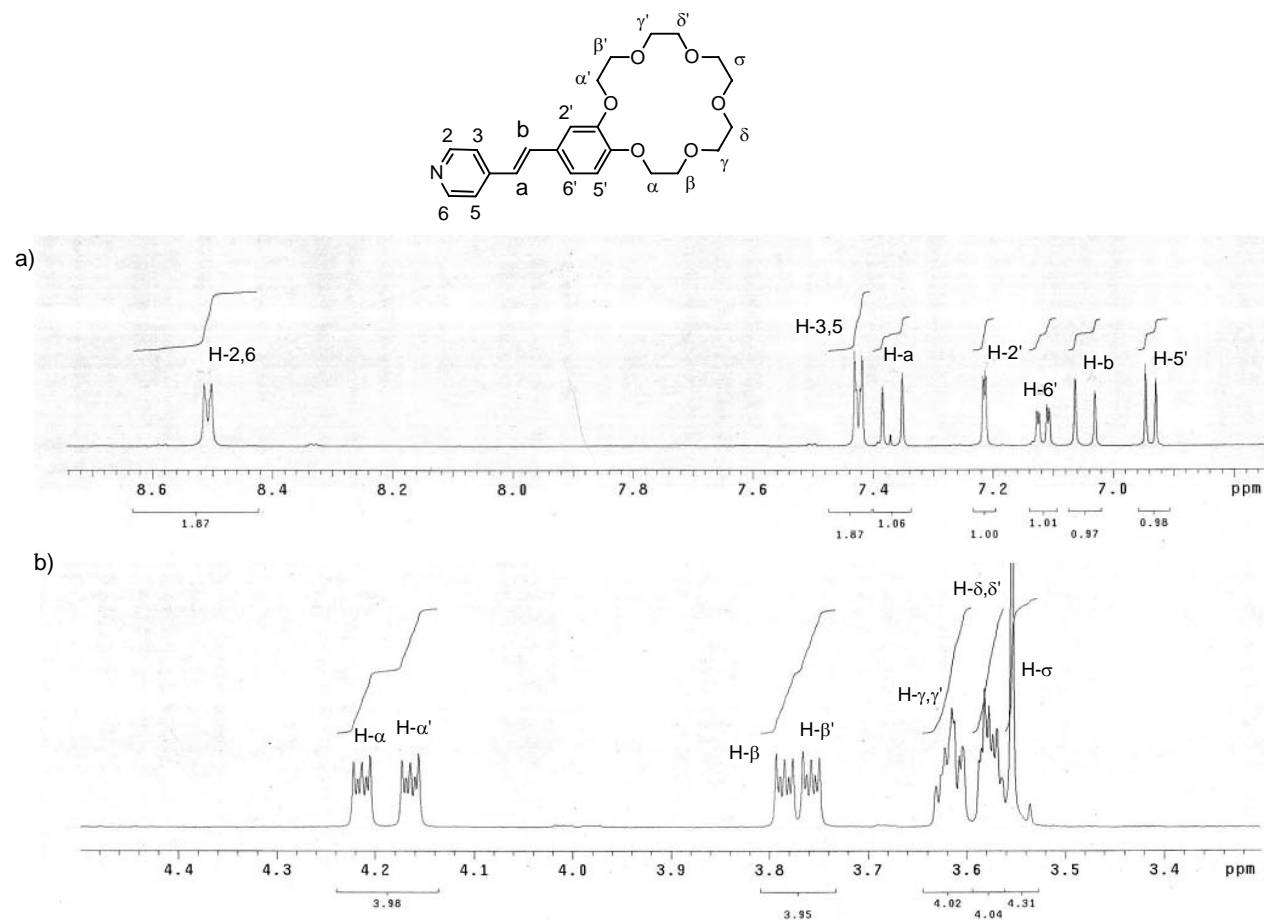

**Fig. S7.** <sup>1</sup>H NMR spectrum of *E-1* in CD<sub>3</sub>CN at 295 K.

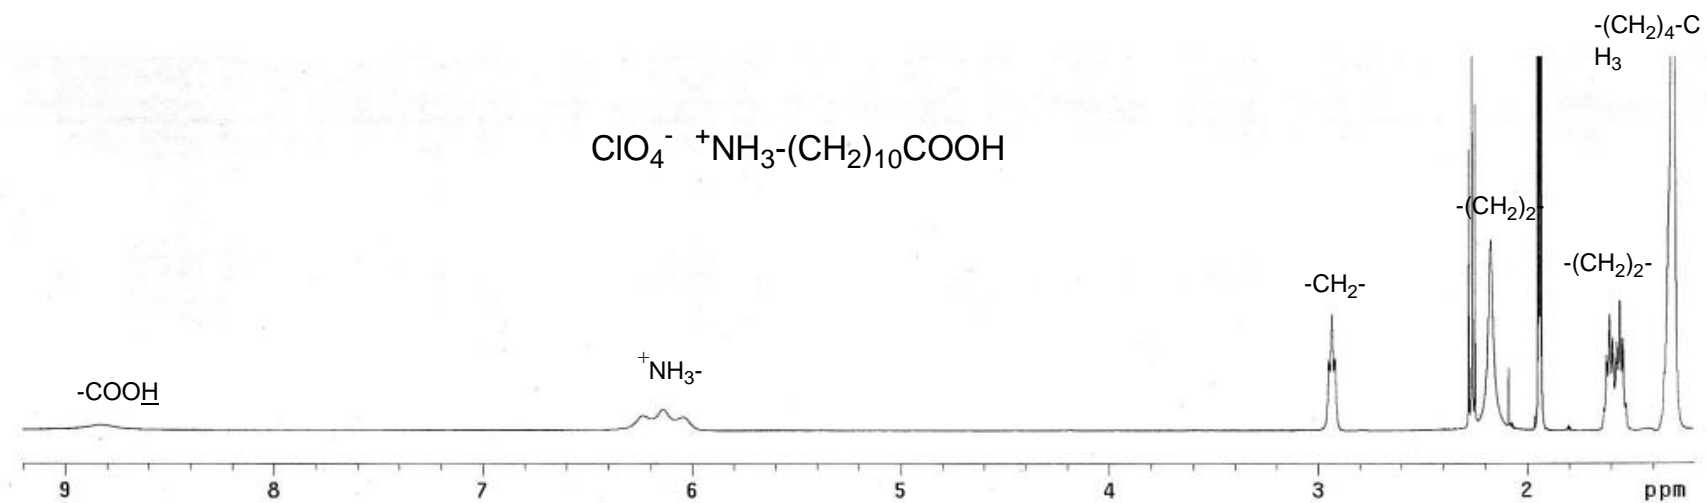

**Fig. S8.**  $^1\text{H}$  NMR spectrum of **A10** in  $\text{CD}_3\text{CN}$  at 295 K.

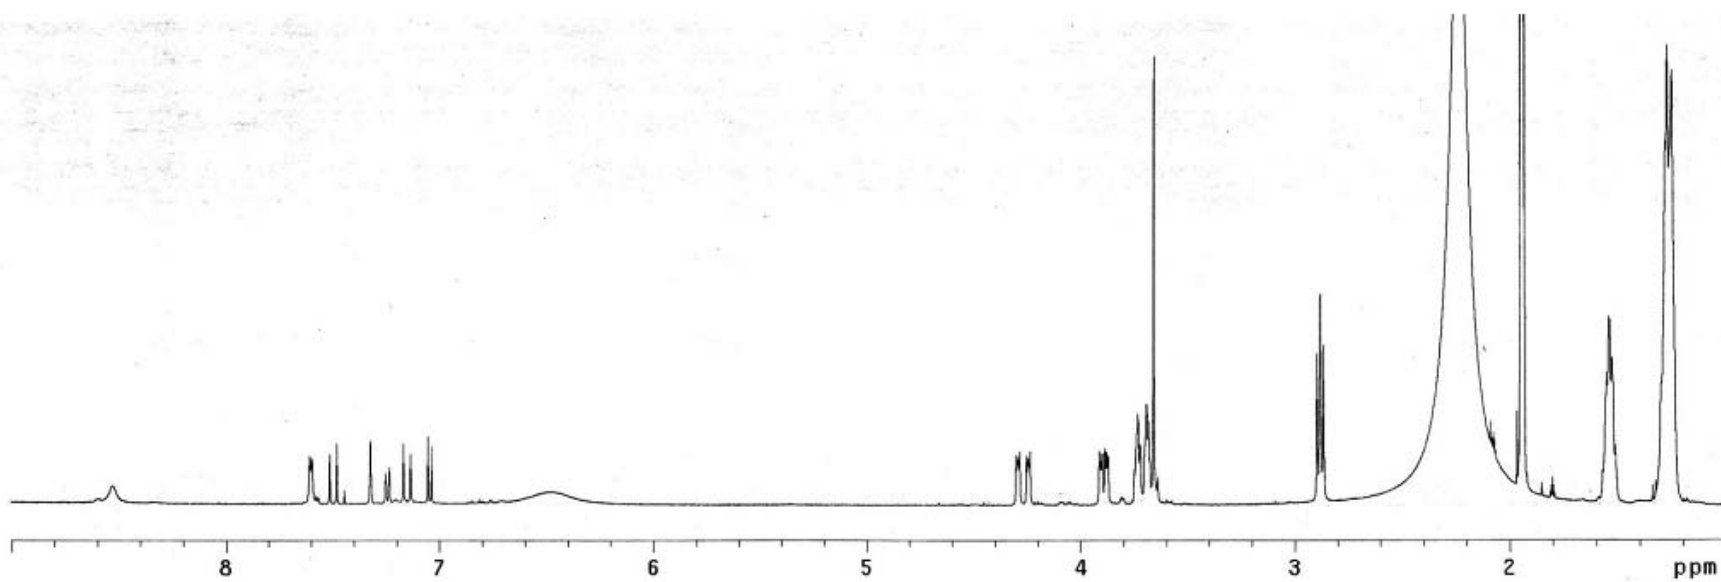

**Fig. S9.** <sup>1</sup>H NMR spectrum of complex *E-1·A10* in CD<sub>3</sub>CN at 295 K.



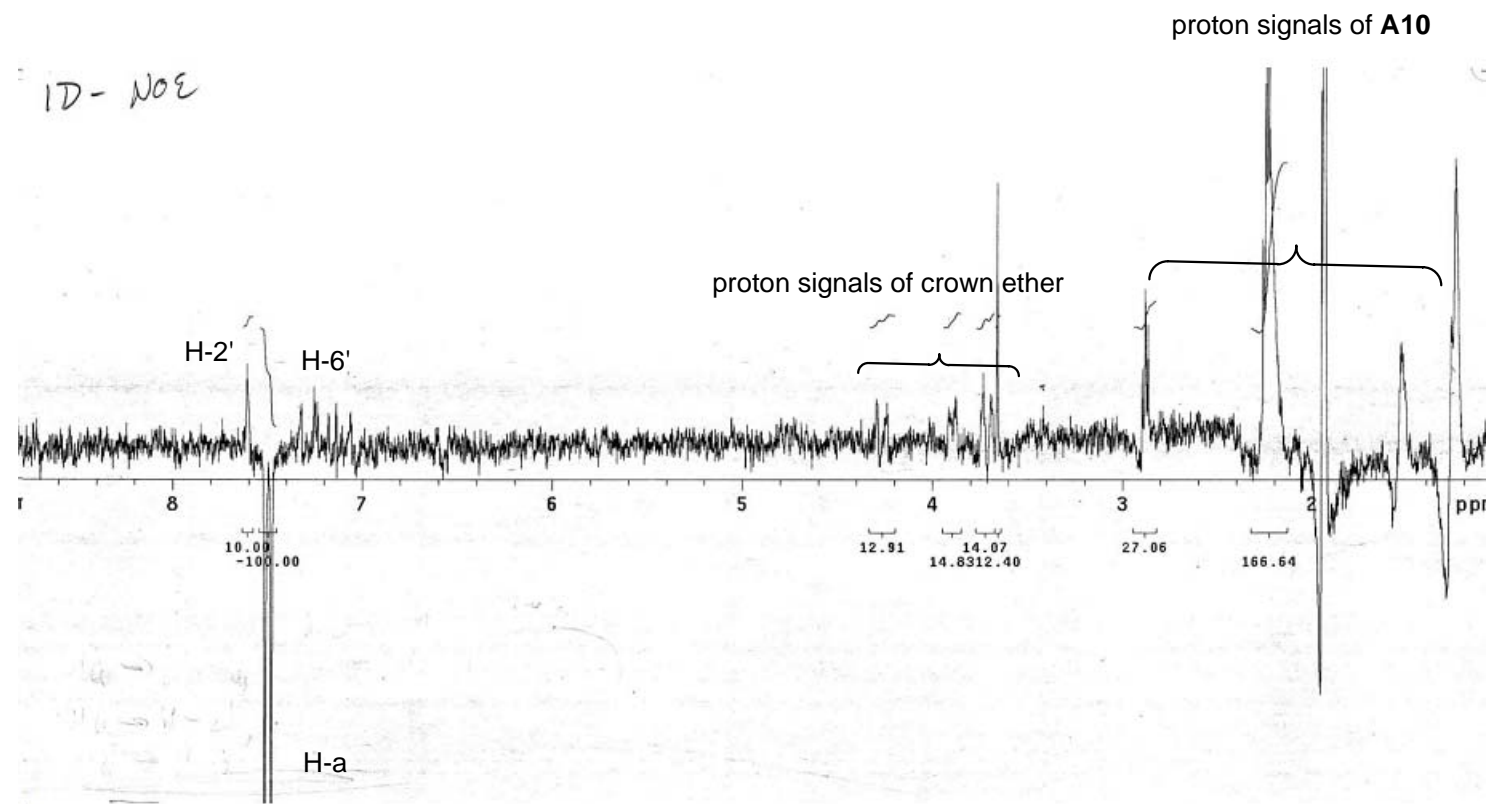

**Fig. S10.**  $^1\text{H}$  NMR spectrum (1D-NOE) of complex  $E-1\cdot A10$  in  $\text{CD}_3\text{CN}$  at 295 K. Excitation of H-a gives enhanced absorption at H-2', H-6' and at the crown ether protons of  $E-1$  and more pronounced enhanced absorption at the methylene protons of  $A10$ .

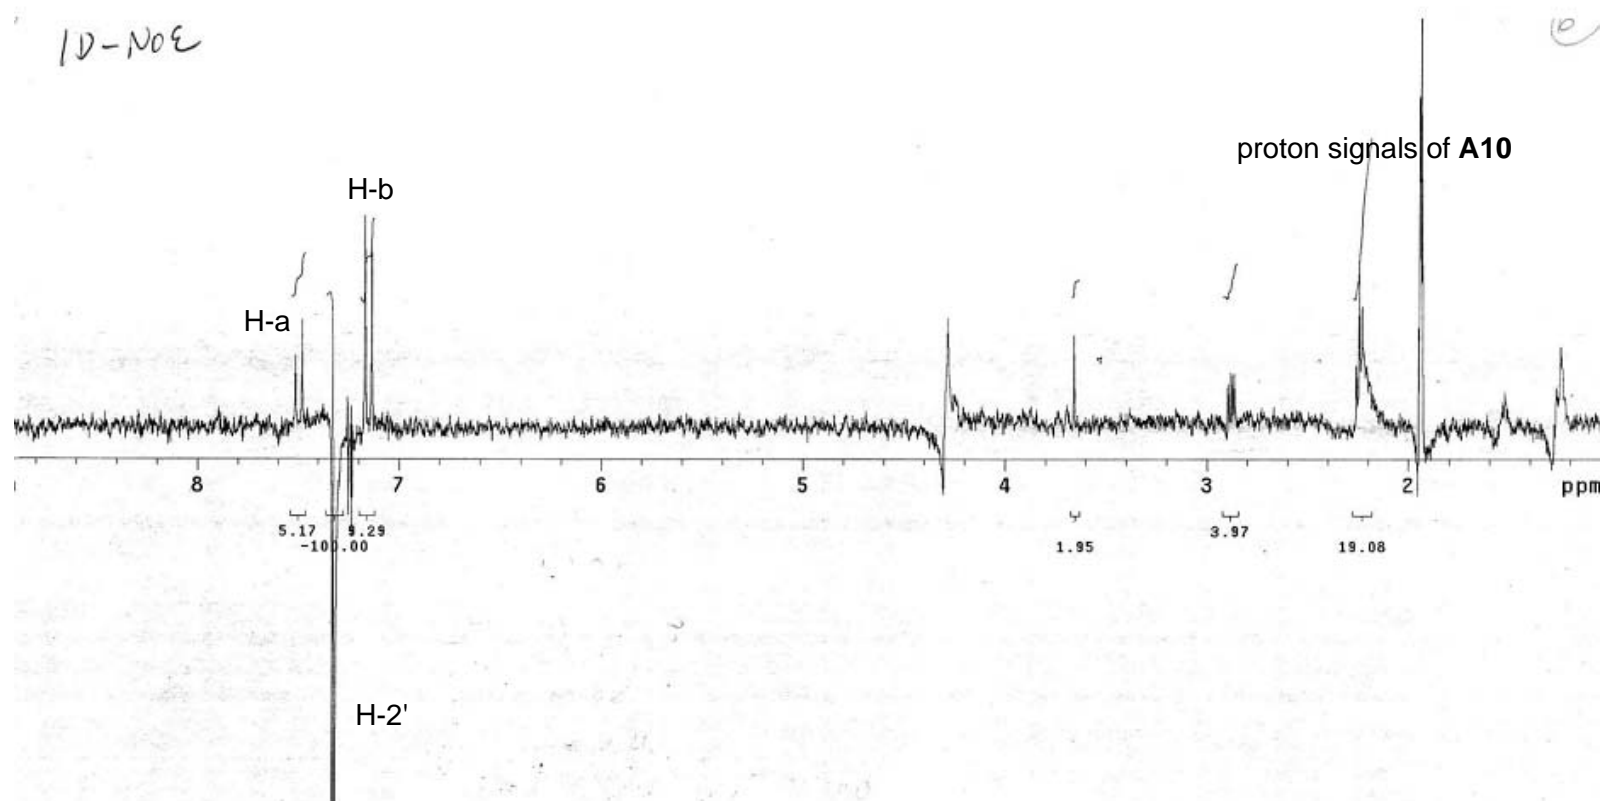

**Fig. S11.**  $^1\text{H}$  NMR spectrum (1D-NOE) of complex  $E\text{-}1\cdot\text{A}10$  in  $\text{CD}_3\text{CN}$  at 295 K. Excitation of H-2' gives enhanced absorption for the H-a and H-b protons of  $E\text{-}1$ , and for the methylene protons of  $\text{A}10$ .

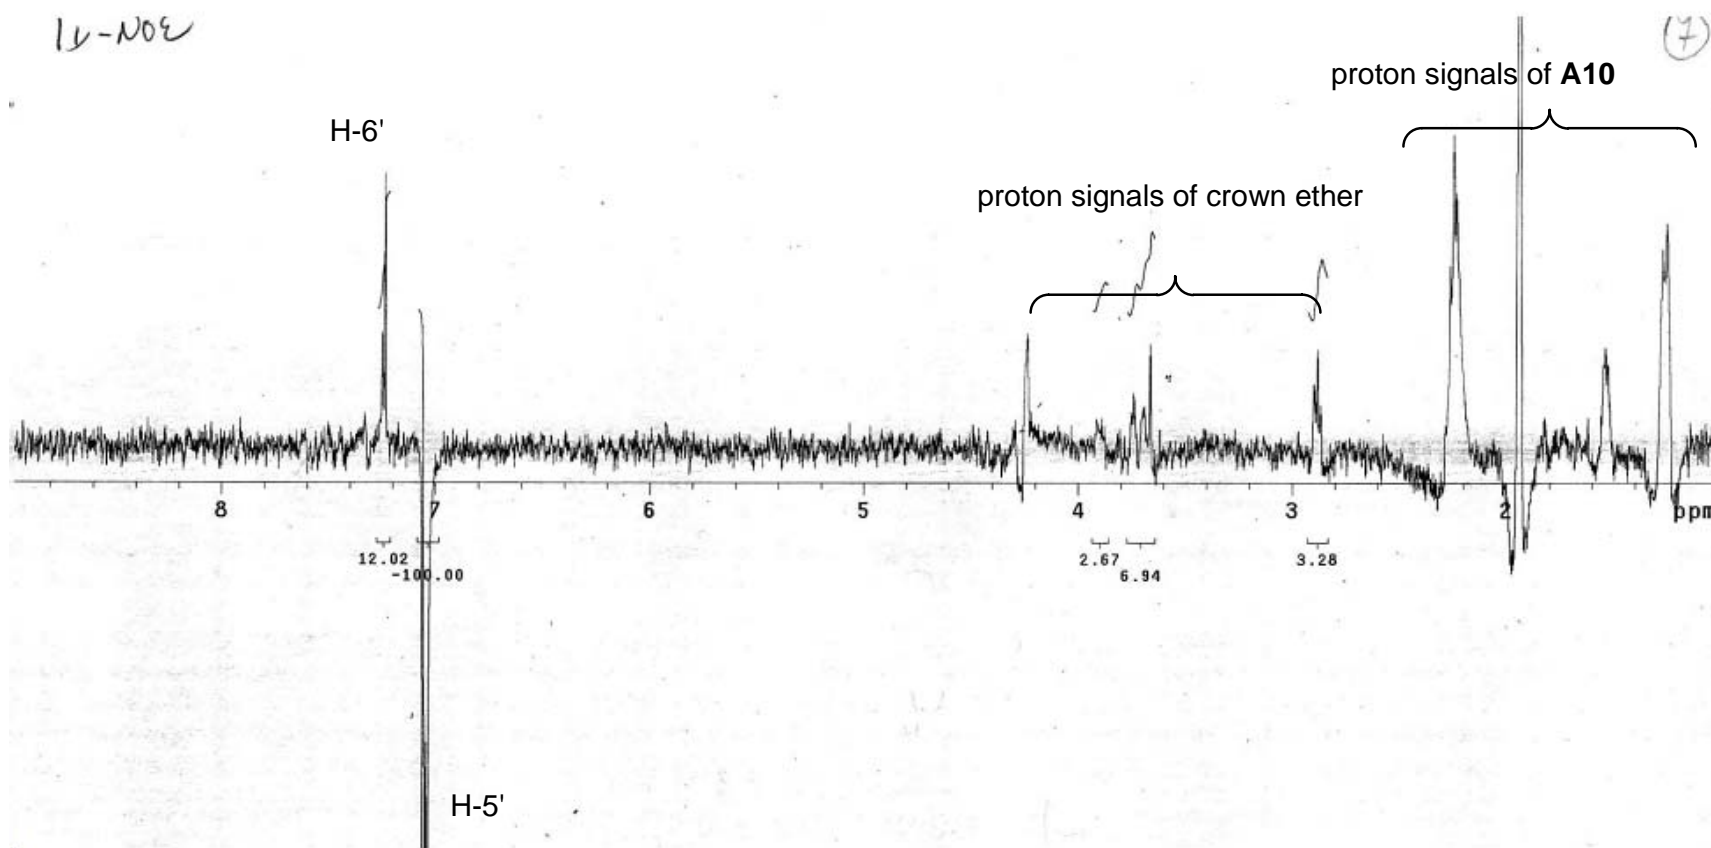

**Fig. S12.**  $^1\text{H}$  NMR spectrum (1D-NOE) of complex *E-1-A10* in  $\text{CD}_3\text{CN}$  at 295 K. Excitation of H-5' gives enhanced absorption at H-6' and the crown ether protons of *E-1* and at the methylene protons of **A10**.

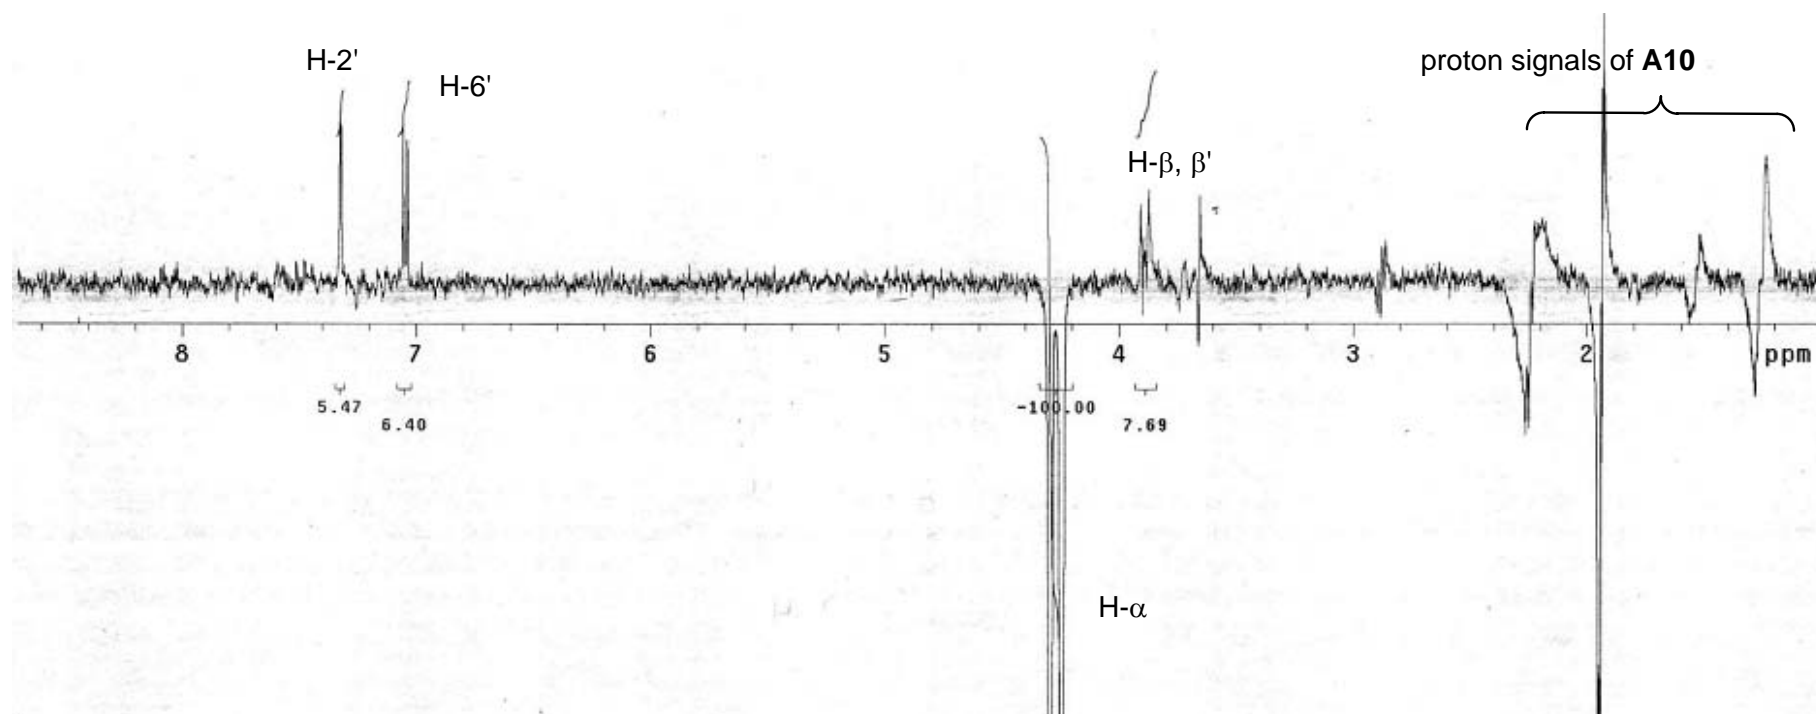

**Fig. S13.**  $^1\text{H}$  NMR spectrum (1D-NOE) of complex *E-1-A10* in  $\text{CD}_3\text{CN}$  at 295 K. Excitation of the  $\text{H-}\alpha$  and  $\text{H-}\alpha'$  protons of *E-1* gives enhanced absorption at the  $\text{H-2'}$ ,  $\text{H-6'}$ ,  $\text{H-}\beta$  and  $\text{H-}\beta'$  protons of *E-1* and little, if any, response at the methylene protons of **A10** (derivative type signals in that region are due to a small shift between spectra with and without excitation at  $\text{H-}\alpha$  and  $\text{H-}\alpha'$ ).

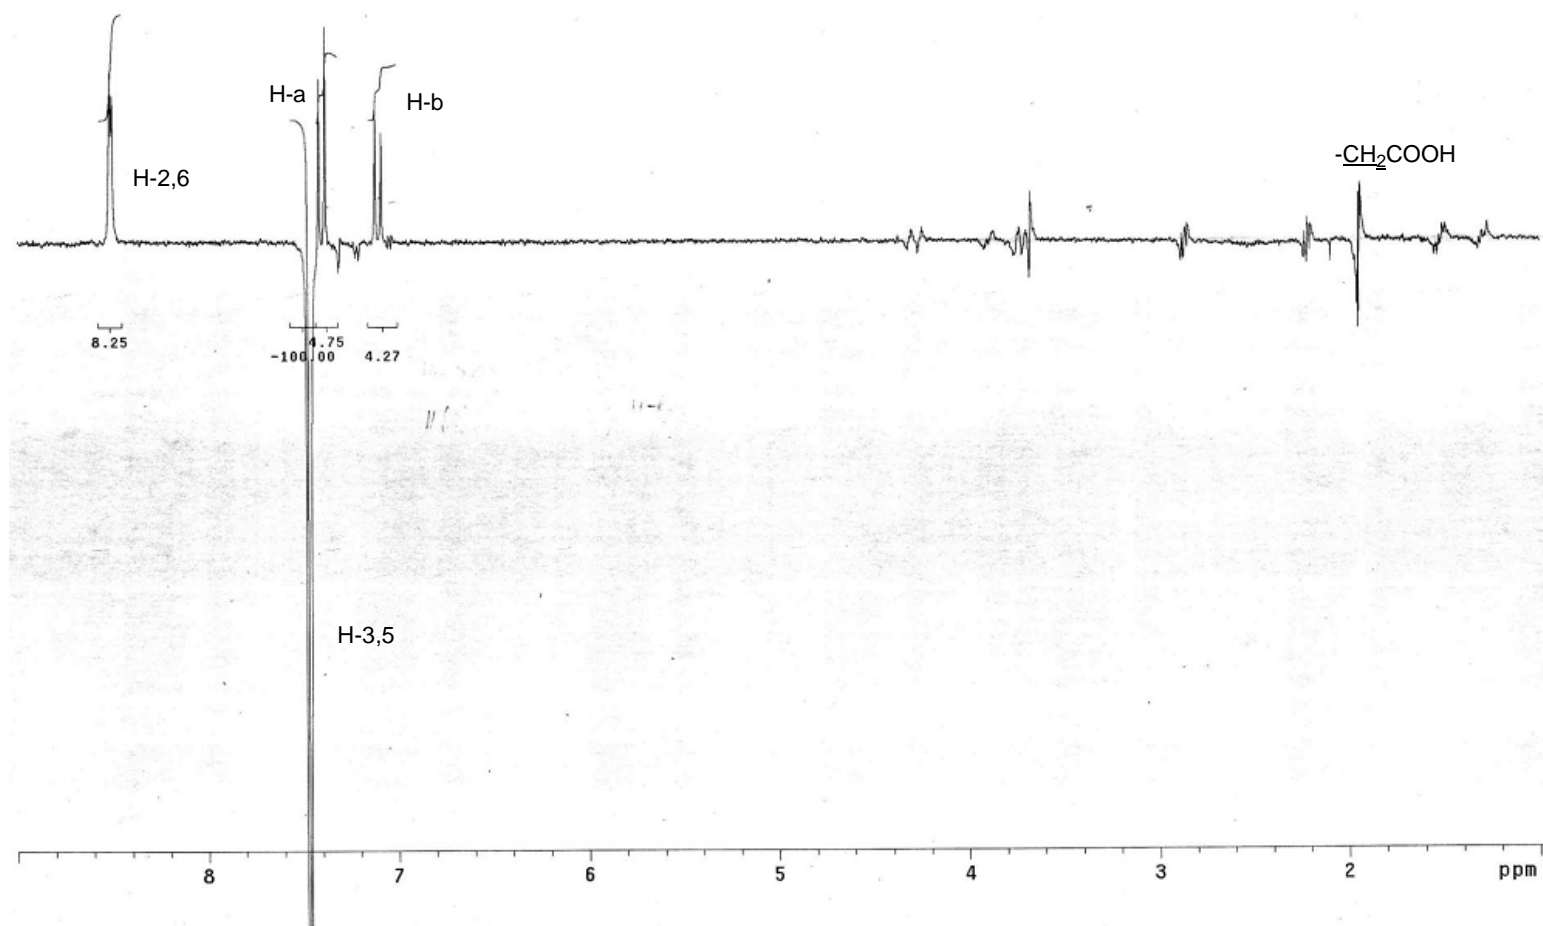

**Fig. S14.**  $^1\text{H}$  NMR spectrum (1D-NOE) of complex *E-1*·**A10** in  $\text{CD}_3\text{CN}$  at 295 K. Excitation at H-3,5, the meta pyridyl proton of *E-1* gives no enhanced absorption in the region of **A10** methylene proton signals.

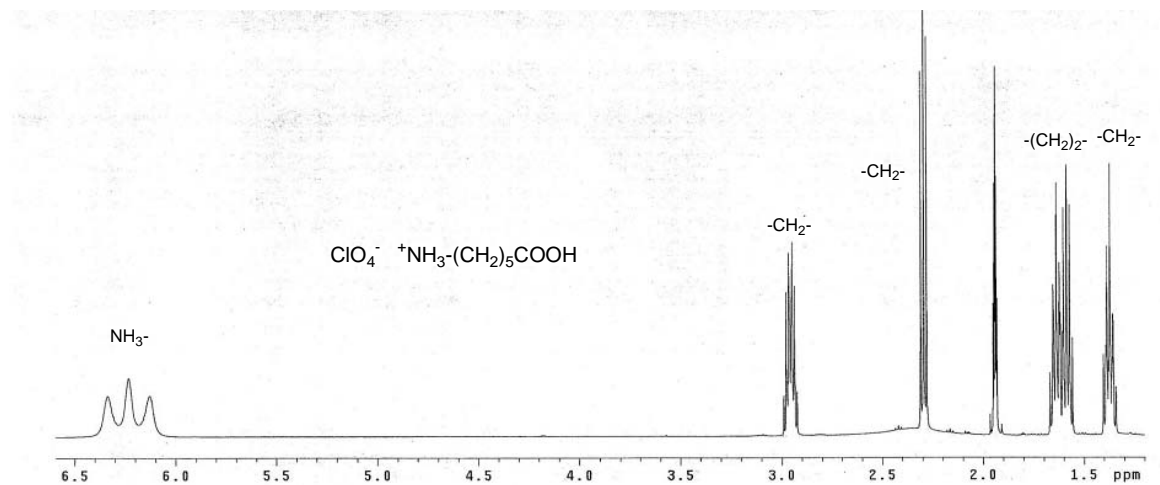

**Fig. S15.**  $^1\text{H}$  NMR spectrum of **A5** in  $\text{CD}_3\text{CN}$  at 295 K.

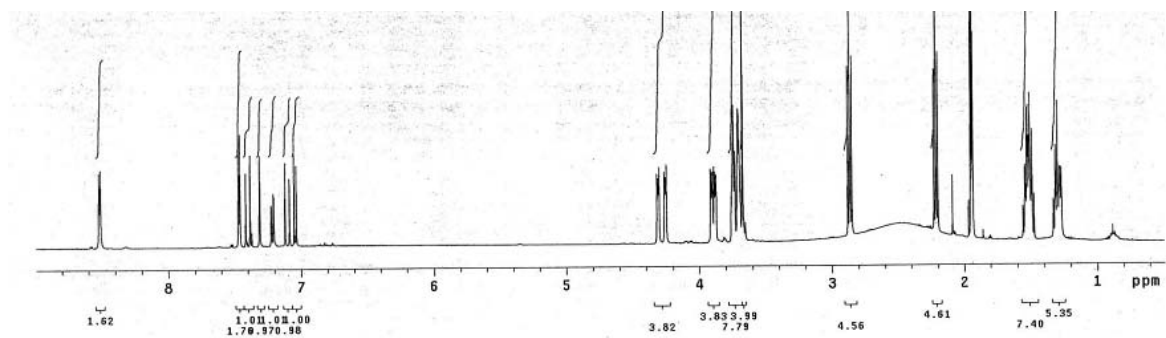

**Fig. S16.** <sup>1</sup>H NMR spectrum of complex *E-1·A5* in CD<sub>3</sub>CN at 295 K.

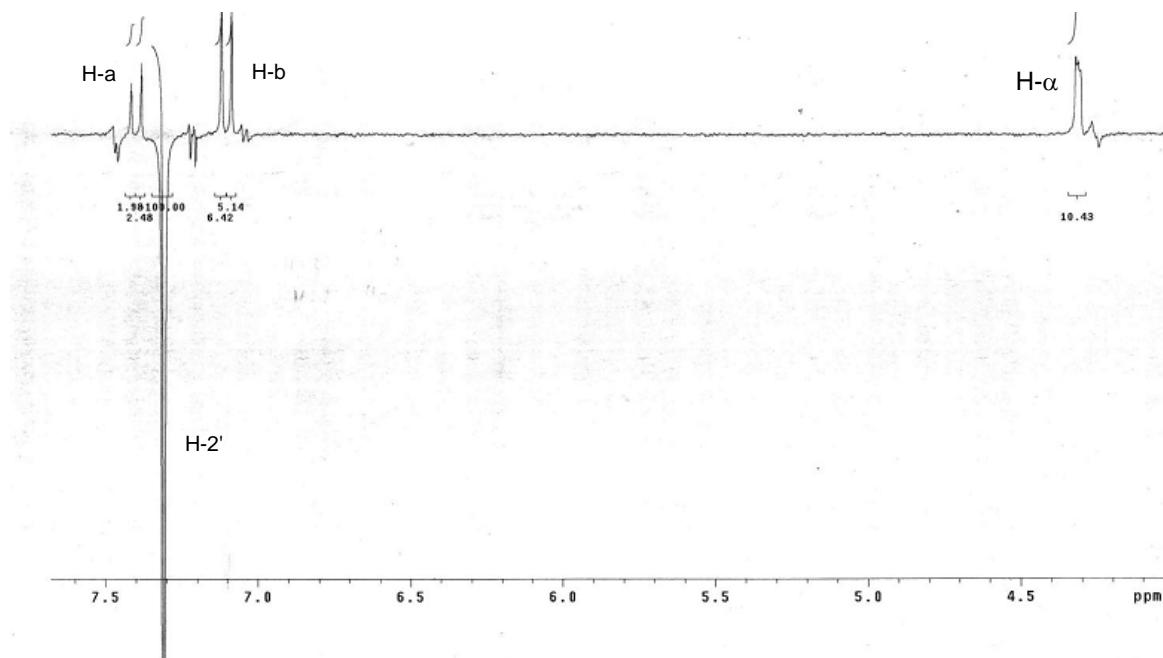

**Fig. S17.** <sup>1</sup>H NMR spectrum (1D-NOE) of complex *E-1·A5* in CD<sub>3</sub>CN at 295 K. Excitation of H-2' gives enhanced absorption at H-a , H-b and tH-α protons of *E-1*.



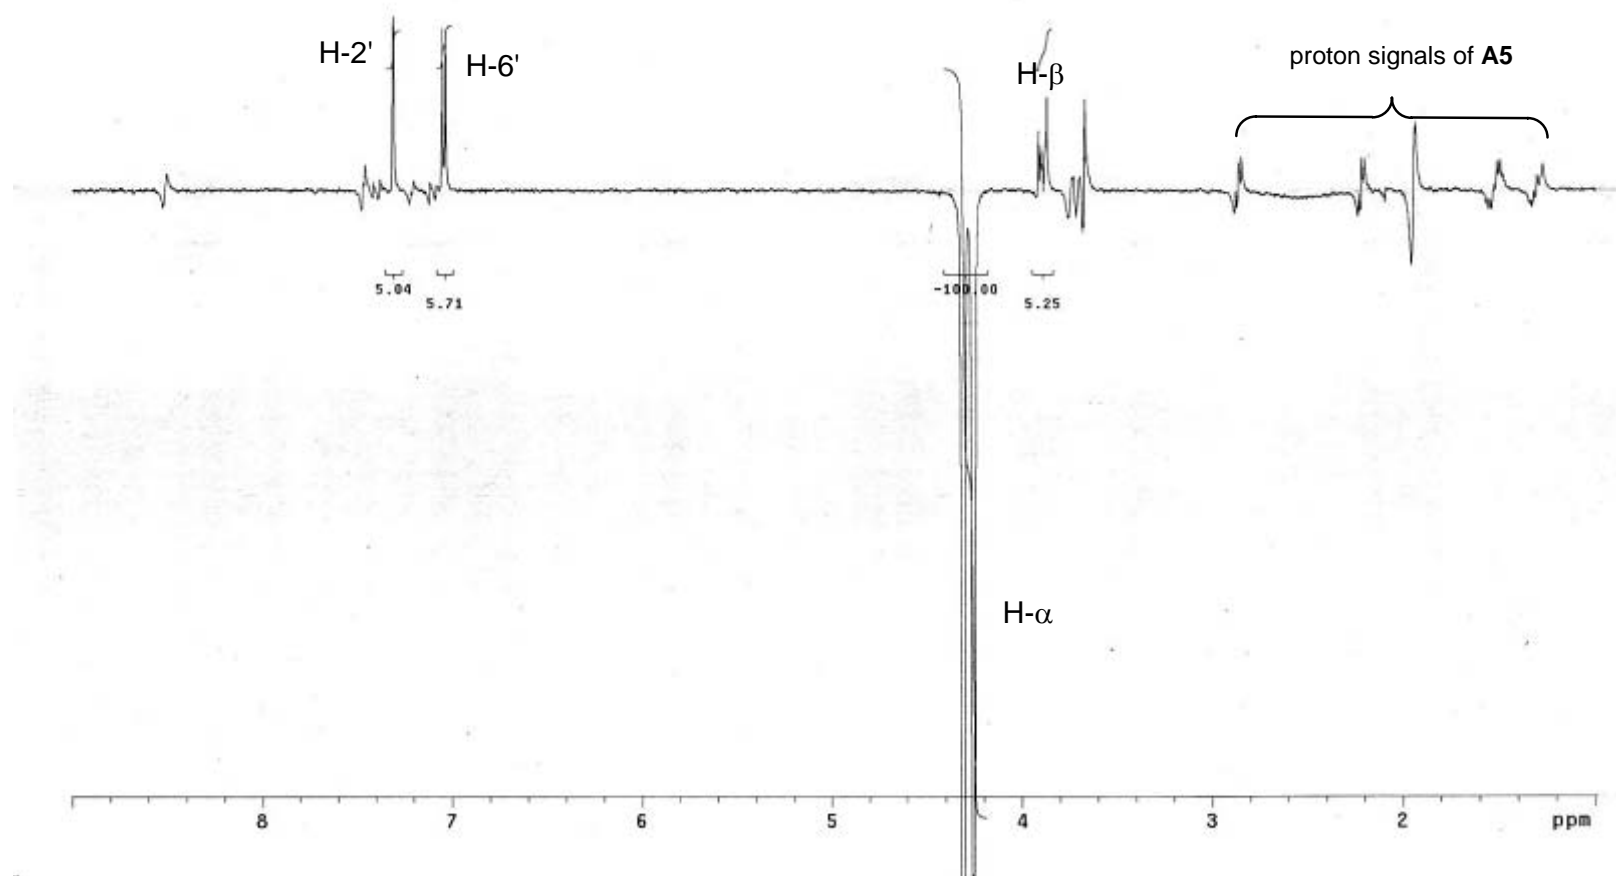

**Fig. S18.**  $^1\text{H}$  NMR spectrum (1D-NOE) of complex  $E\text{-}1\cdot\text{A}5$  in  $\text{CD}_3\text{CN}$  at 295 K. Excitation of the  $\text{H-}\alpha$  and  $\text{H-}\alpha'$  protons of  $E\text{-}1$  gives enhanced absorption for the  $\text{H-}2'$ ,  $\text{H-}6'$  and  $\text{H-}\beta$  protons of  $E\text{-}1$  and a smaller response at the methylene protons of  $\text{A}5$  (derivative type signals in that region are due to a small shift between spectra with and without excitation at  $\text{H-}\alpha$  and  $\text{H-}\alpha'$ ).

The following figures concern the interaction of 4-methylpyridine (MePy) with acetic acid in CD<sub>3</sub>CN at 295 K. Note the disappearance of the carboxylic proton at ~9 d in the <sup>1</sup>H NMR spectrum of the 1:1 mixture.

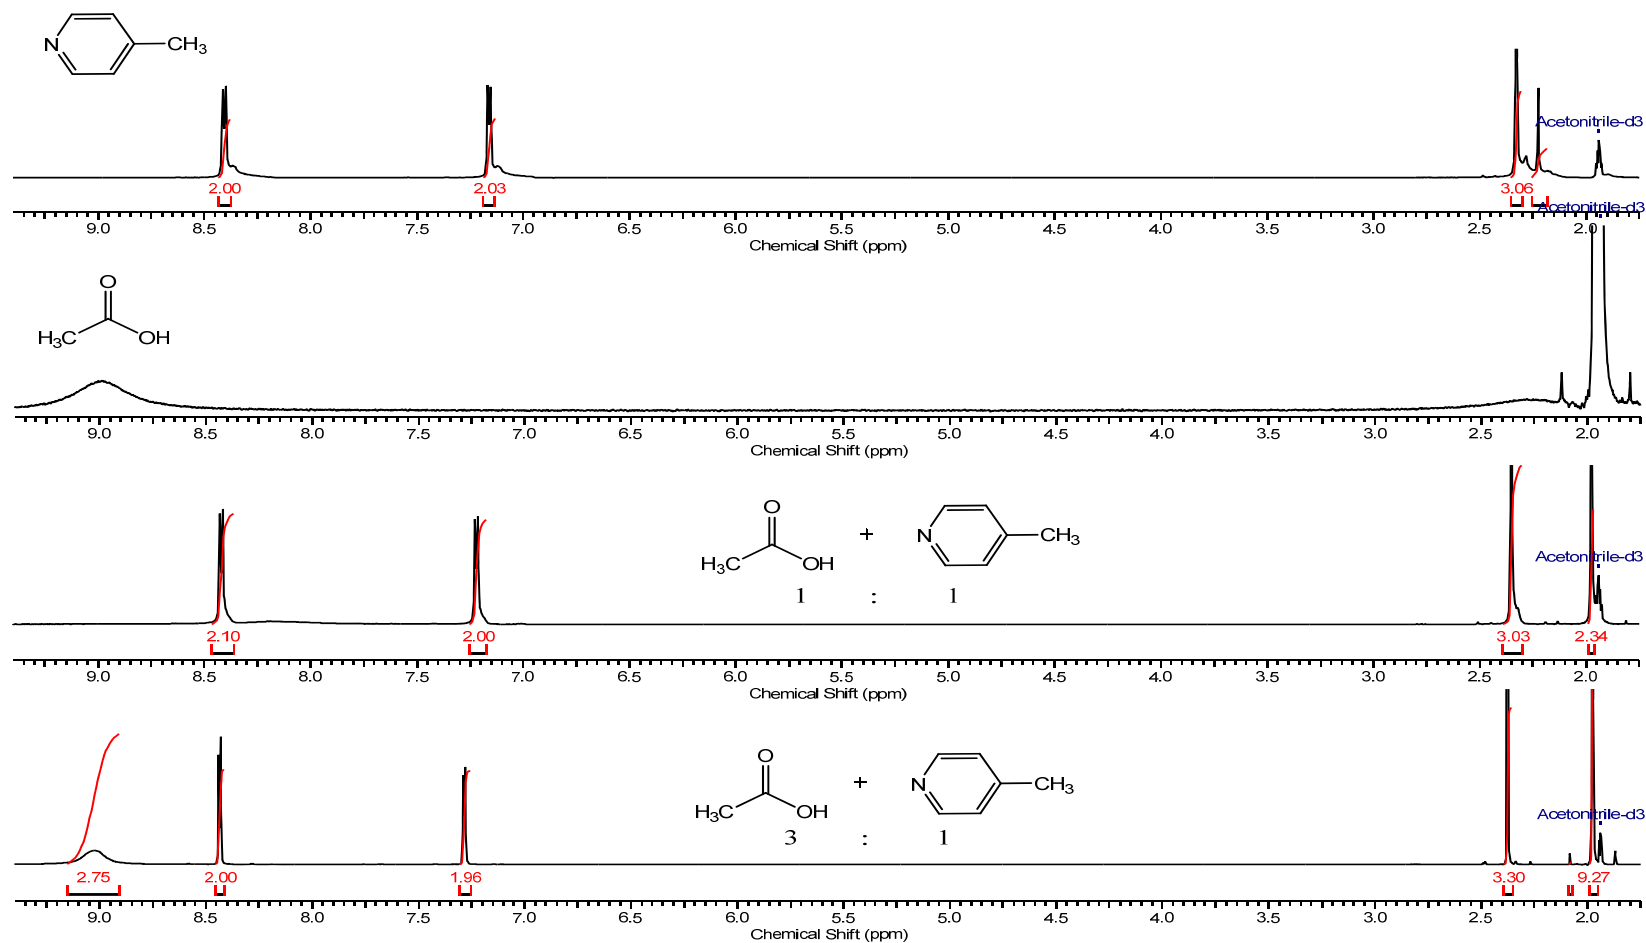

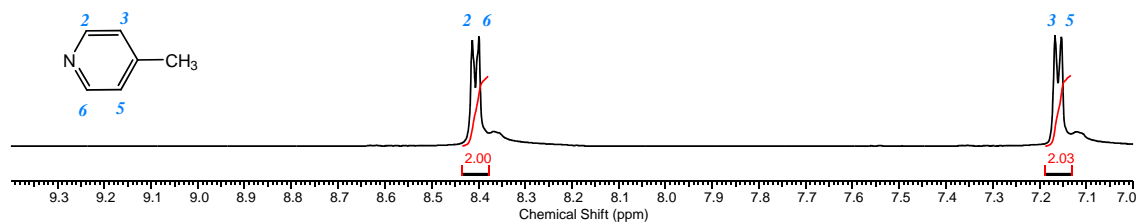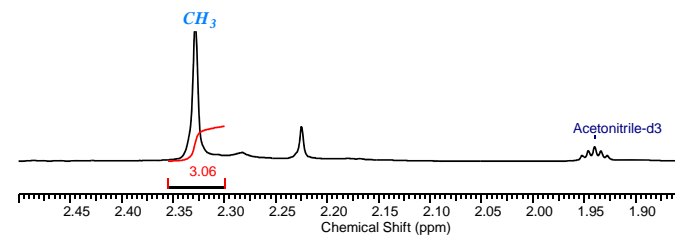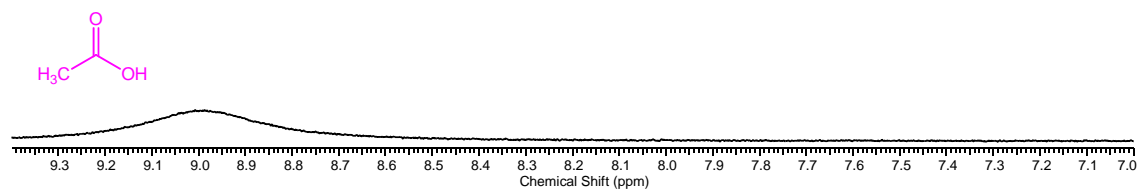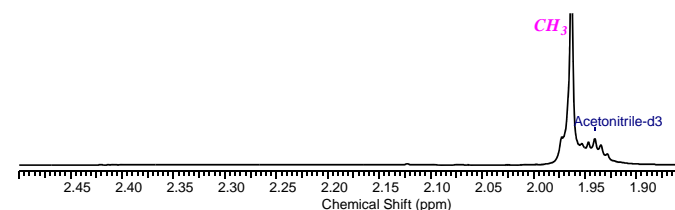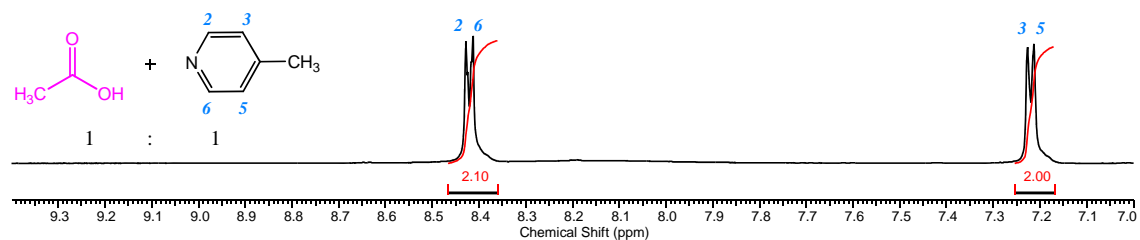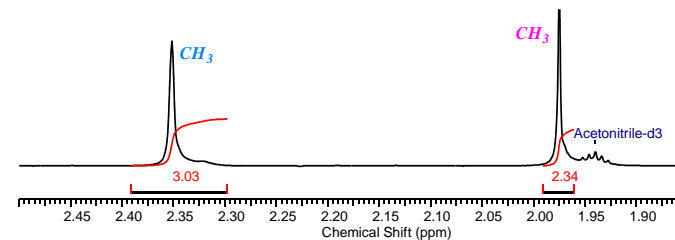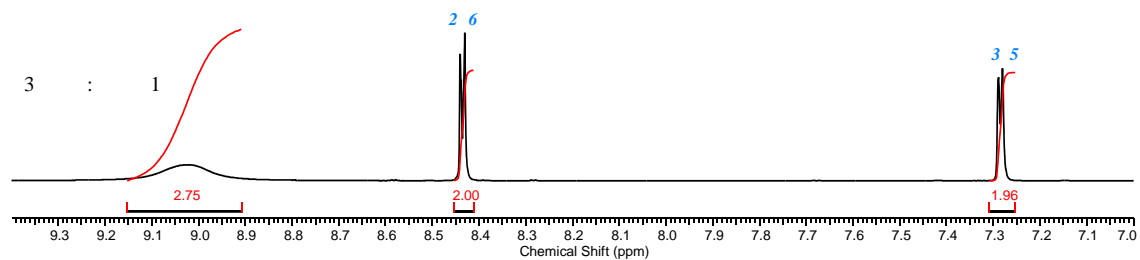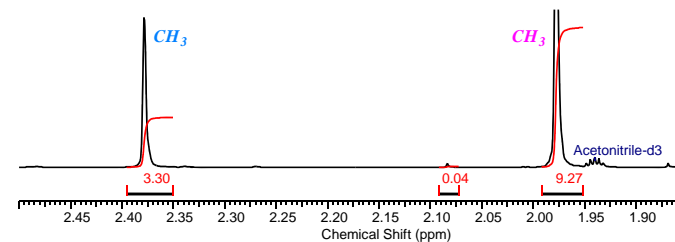

Supplement: c1pp05007a.pdf [file c1pp05007a.pdf]
